# Supplementary figures and images for: Evolution of Reproductive Life History in Mammals and the Associated Change of Functional Constraints
Source: MDPI journal article supplement (doi:10.3390/genes12050740), 2021-05-14

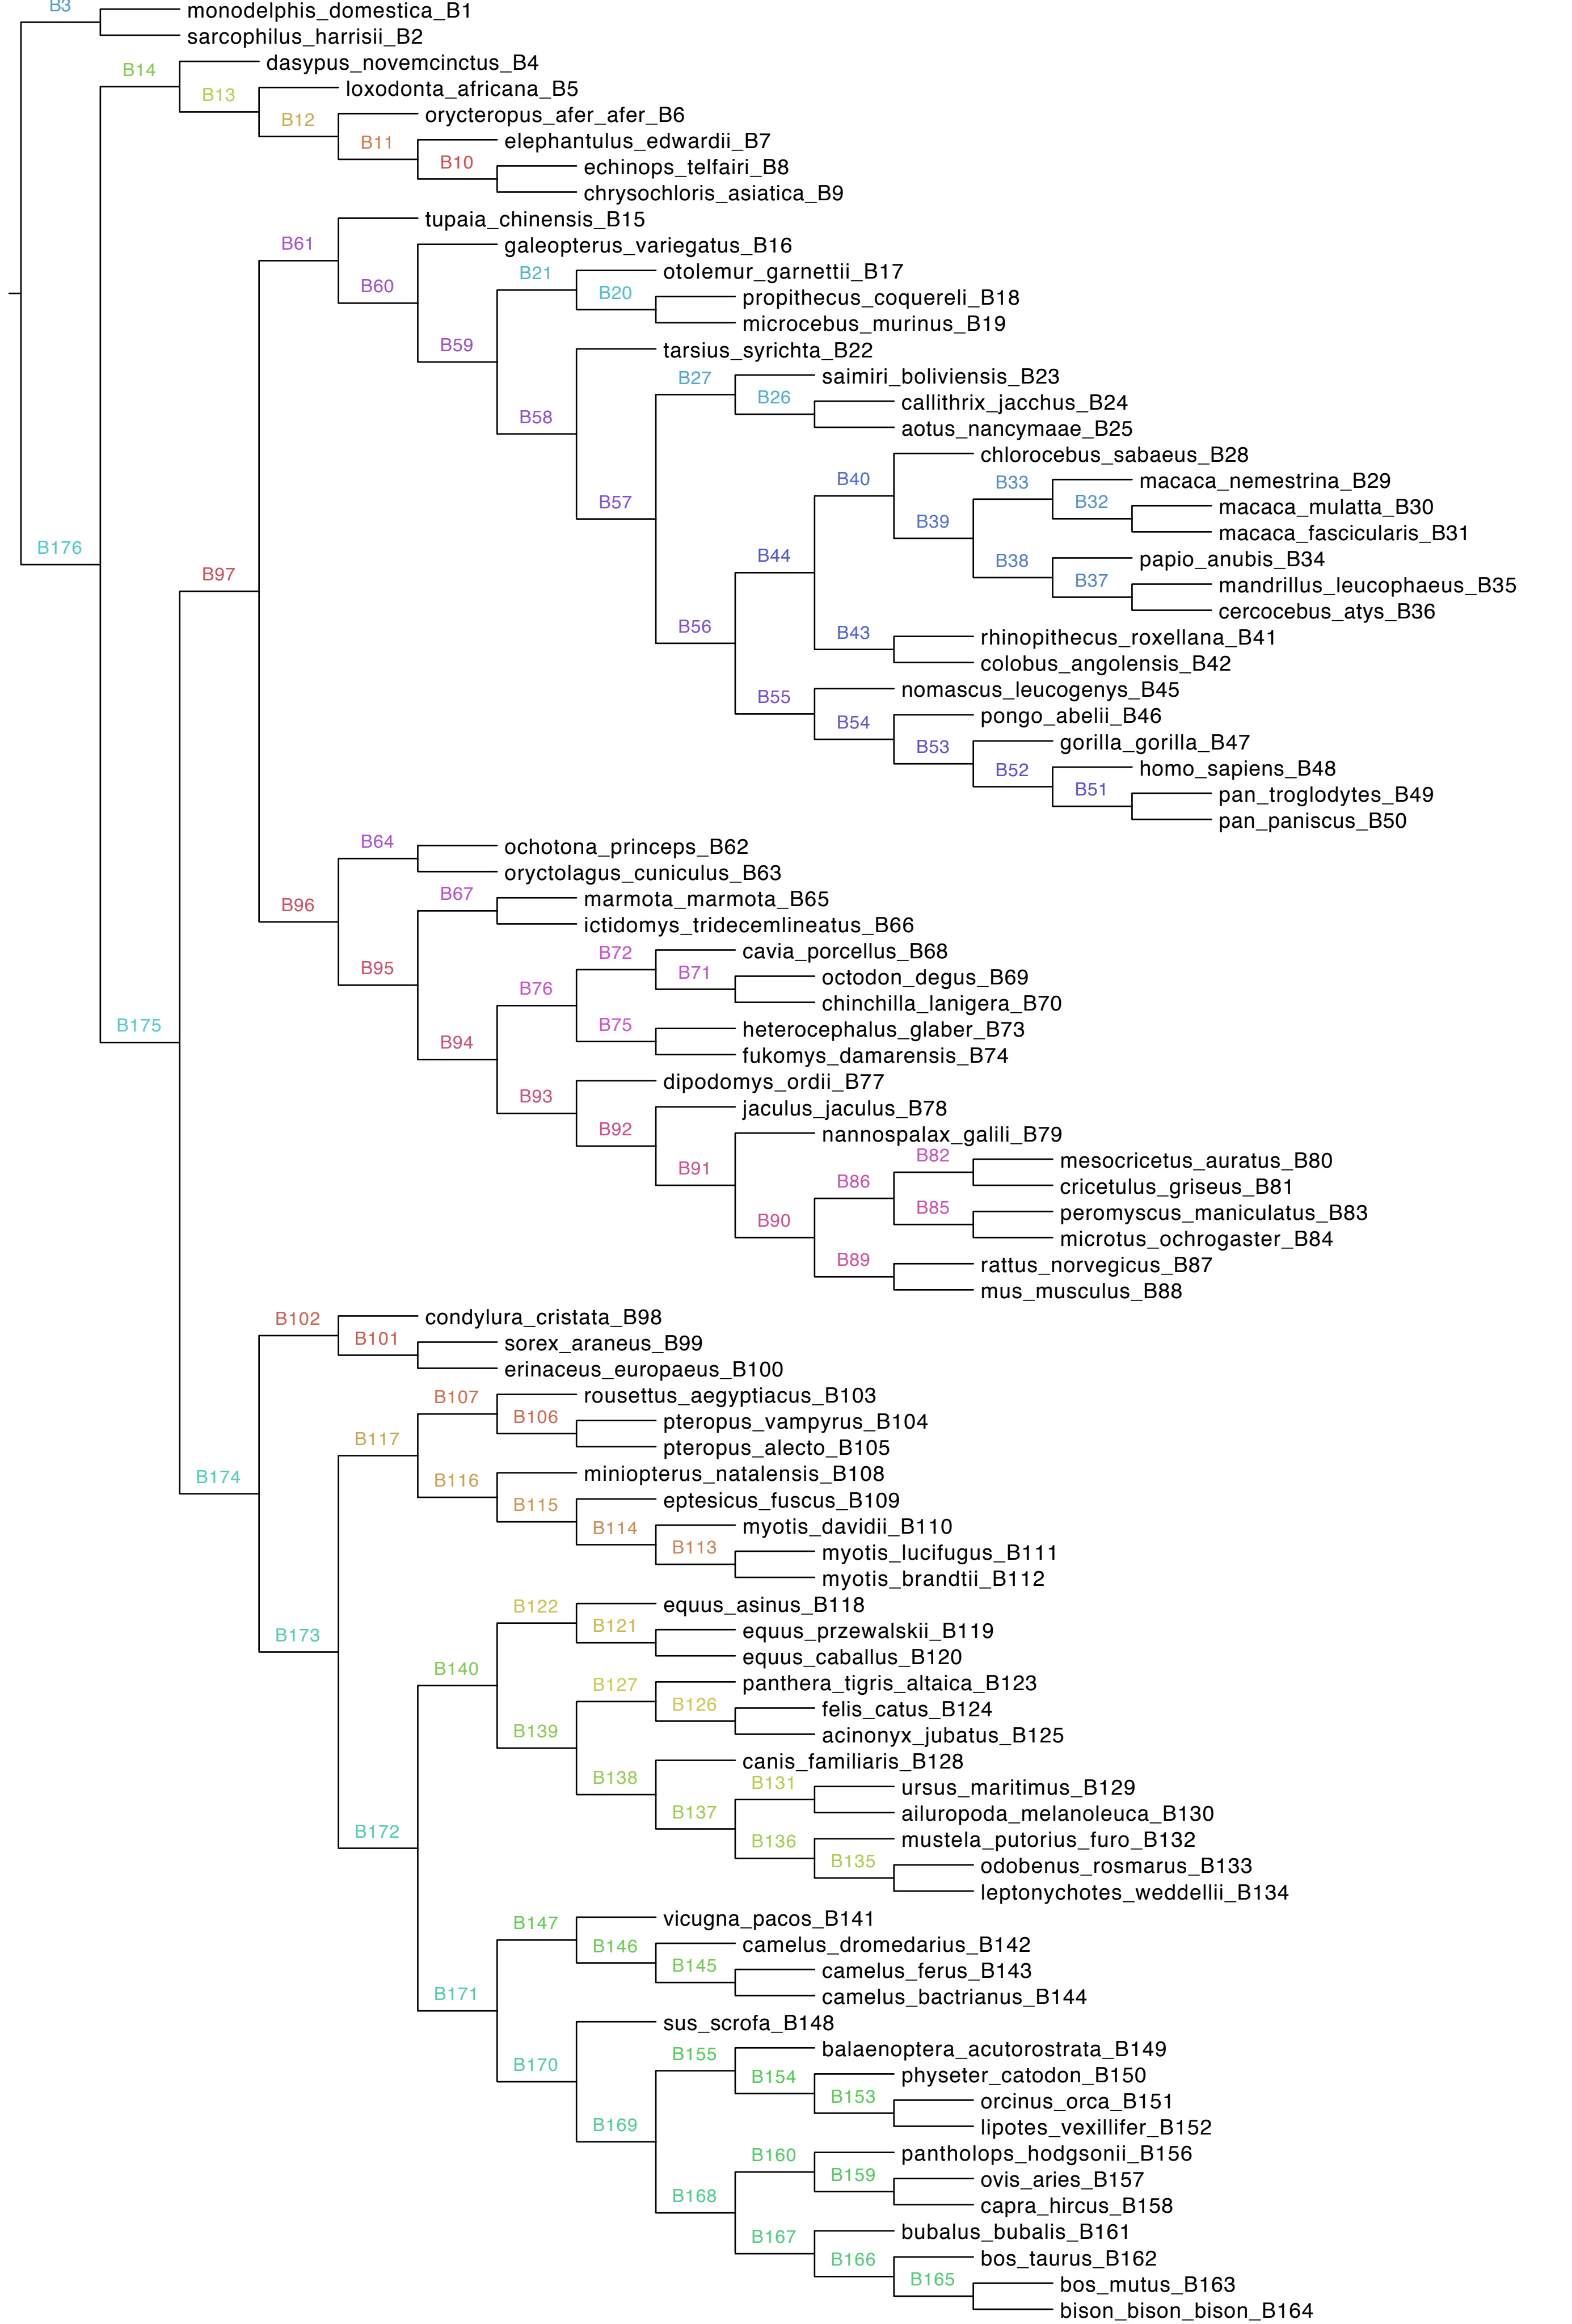

Supplement: s1 [file s1]
